# Supplementary material for: Anticipating New Treatments for Cystic Fibrosis: A Global Survey of Researchers
Source: MDPI journal article supplement (doi:10.3390/jcm11051283), 2022-02-26

## SUPPLEMENTARY MATERIAL

|     |                                                                                                                                    |    |
|-----|------------------------------------------------------------------------------------------------------------------------------------|----|
| 1   | Statistical Analysis of the survey.....                                                                                            | 2  |
| 1.1 | Please indicate your knowledge level on cystic fibrosis .....                                                                      | 2  |
| 1.2 | Which of the following therapeutic options is most likely to be successful in treating cystic fibrosis in the next 15 years? ..... | 2  |
| 1.3 | Respondents who selected CFTR modulator therapies as the most likely to be successful in treating CF in the next 15 years .....    | 3  |
| 1.4 | Respondents who selected genetic therapies as the most likely to be successful in treating CF in the next 15 years.....            | 6  |
| 1.5 | Respondents who selected 'other' option as the most likely to be successful in treating CF in the next 15 years.....               | 9  |
| 2   | Descriptive statistics of the results according to the chosen therapeutic option and the respondents' level of knowledge .....     | 11 |
| 2.1 | Respondents who selected CFTR modulator therapies as the most likely to be successful in treating CF in the next 15 years .....    | 11 |
| 2.2 | Respondents who selected genetic therapies as the most likely to be successful in treating CF in the next 15 years.....            | 16 |
| 2.3 | Respondents who selected 'other' option as the most likely to be successful in treating CF in the next 15 years.....               | 22 |

## 1 Statistical Analysis of the survey

### 1.1 Please indicate your knowledge level on cystic fibrosis

|                    |   |                    |         |
|--------------------|---|--------------------|---------|
| Sample size        |   | 401                |         |
| Margin of error    |   | 4.8%               |         |
| Mean               |   | 2.48               |         |
| Standard deviation |   | 0.852              |         |
| Percentiles        | ¼ | 2 (good knowledge) |         |
|                    | ½ | 2 (good knowledge) |         |
|                    | ¾ | 3 (high knowledge) |         |
| Binomial test      |   | Test ratio         | P-value |
|                    |   | 0.50               | 0.028   |
| Kolmogorov-Smirnov |   | Test ratio         | P-value |
|                    |   | 0.370              | 0.000   |
| Shapiro-Wilk       |   | Test ratio         | P-value |
|                    |   | 0.632              | 0.000   |

### 1.2 Which of the following therapeutic options is most likely to be successful in treating cystic fibrosis in the next 15 years?

| Therapy                  | Number of responses |
|--------------------------|---------------------|
| CFTR modulator Therapies | 288                 |
| Genetic Therapies        | 18                  |
| Other Therapies          | 95                  |

|                           |   |                              |         |
|---------------------------|---|------------------------------|---------|
| Sample size               |   | 401                          |         |
| Margin of error           |   | 4.8%                         |         |
| Mean                      |   | 3.38                         |         |
| Standard deviation        |   | 0.822                        |         |
| Percentiles               | ¼ | 2 (Genetic therapies)        |         |
|                           | ½ | 3 (CFTR modulator therapies) |         |
|                           | ¾ | 3 (CFTR modulator therapies) |         |
| Mann-Whitney U            |   | Statistic                    | P-value |
|                           |   | -1.996                       | 0.046   |
| Wilcoxon (H0: median = 3) |   | Statistic                    | P-value |
|                           |   | -0.780                       | 0.435   |
| Kolmogorov-Smirnov        |   | Statistic                    | P-value |
|                           |   | 0.447                        | 0.000   |
| Shapiro-Wilk              |   | Statistic                    | P-value |
|                           |   | 0.577                        | 0.000   |

|                |                        | Other Therapies | Genetic Therapies | CFTR Modulator Therapies | Total  |
|----------------|------------------------|-----------------|-------------------|--------------------------|--------|
| Good knowledge | Number of observations | 14              | 50                | 151                      | 223    |
|                | Frequency              | 6.28%           | 22.42%            | 67.71%                   | 100.0% |

|                       |                               |       |        |        |        |
|-----------------------|-------------------------------|-------|--------|--------|--------|
| <b>High Knowledge</b> | <b>Number of observations</b> | 9     | 29     | 137    | 178    |
|                       | <b>Frequency</b>              | 5.06% | 16.29% | 76.97% | 100.0% |

### 1.3 Respondents who selected CFTR modulator therapies as the most likely to be successful in treating CF in the next 15 years

#### 1.3.1 Please rank the following approaches from most likely to least likely to be successful in treating cystic fibrosis in the next 15 years

|                     | <b>Most Likely (1)</b> | <b>2</b> | <b>3</b> | <b>Least likely (4)</b> |
|---------------------|------------------------|----------|----------|-------------------------|
| <b>Potentiators</b> | 25.50%                 | 51.40%   | 14.60%   | 8.50%                   |
| <b>Correctors</b>   | 57.00%                 | 23.30%   | 9.20%    | 10.40%                  |
| <b>Amplifiers</b>   | 8.30%                  | 12.50%   | 42.90%   | 36.30%                  |
| <b>Stabilizers</b>  | 9.10%                  | 12.40%   | 34.00%   | 44.40%                  |

|                       |                  | <b>Potentiators</b> | <b>Correctors</b> | <b>Amplifiers</b> | <b>Stabilizers</b> |
|-----------------------|------------------|---------------------|-------------------|-------------------|--------------------|
| <b>Mann-Whitney U</b> | <b>Statistic</b> | -2.080              | -2.114            | -0.223            | -3.840             |
|                       | <b>P-value</b>   | 0.037               | 0.035             | 0.823             | 0.000              |

| <b>Potentiators</b>   |                               |          |          |          |          |              |
|-----------------------|-------------------------------|----------|----------|----------|----------|--------------|
|                       |                               | <b>1</b> | <b>2</b> | <b>3</b> | <b>4</b> | <b>Total</b> |
| <b>Good knowledge</b> | <b>Number of observations</b> | 29       | 53       | 25       | 13       | 120          |
|                       | <b>Frequency</b>              | 24.2%    | 44.2%    | 20.8%    | 10.8%    | 100.0%       |
| <b>High Knowledge</b> | <b>Number of observations</b> | 34       | 74       | 11       | 8        | 127          |
|                       | <b>Frequency</b>              | 26.8%    | 58.3%    | 8.7%     | 6.3%     | 100.0%       |

| <b>Correctors</b>     |                               |          |          |          |          |              |
|-----------------------|-------------------------------|----------|----------|----------|----------|--------------|
|                       |                               | <b>1</b> | <b>2</b> | <b>3</b> | <b>4</b> | <b>Total</b> |
| <b>Good knowledge</b> | <b>Number of observations</b> | 62       | 28       | 15       | 16       | 121          |
|                       | <b>Frequency</b>              | 51.2%    | 23.1%    | 12.4%    | 13.2%    | 100.0%       |
| <b>High Knowledge</b> | <b>Number of observations</b> | 80       | 30       | 8        | 10       | 128          |
|                       | <b>Frequency</b>              | 62.5%    | 23.4%    | 6.3%     | 7.8%     | 100.0%       |

| <b>Amplifiers</b>     |                               |          |          |          |          |              |
|-----------------------|-------------------------------|----------|----------|----------|----------|--------------|
|                       |                               | <b>1</b> | <b>2</b> | <b>3</b> | <b>4</b> | <b>Total</b> |
| <b>Good knowledge</b> | <b>Number of observations</b> | 10       | 18       | 42       | 46       | 116          |
|                       | <b>Frequency</b>              | 8.6%     | 15.5%    | 36.2%    | 39.7%    | 100.0%       |
| <b>High Knowledge</b> | <b>Number of observations</b> | 10       | 12       | 61       | 41       | 124          |
|                       | <b>Frequency</b>              | 8.1%     | 9.7%     | 49.2%    | 33.1%    | 100.0%       |

| Stabilizers    |                        |       |       |       |       |        |
|----------------|------------------------|-------|-------|-------|-------|--------|
|                |                        | 1     | 2     | 3     | 4     | Total  |
| Good knowledge | Number of observations | 19    | 19    | 37    | 41    | 116    |
|                | Frequency              | 16.4% | 16.4% | 31.9% | 35.3% | 100.0% |
| High Knowledge | Number of observations | 3     | 11    | 45    | 66    | 125    |
|                | Frequency              | 2.4%  | 8.8%  | 36.0% | 52.8% | 100.0% |

### 1.3.2 Fixing or replacing the CFTR gene will lead to a cure for cystic fibrosis

|                           |   |                            |         |
|---------------------------|---|----------------------------|---------|
| Sample size               |   | 252                        |         |
| Margin of error           |   | 6.1%                       |         |
| Mean                      |   | 2.86                       |         |
| Standard deviation        |   | 1.00                       |         |
| Percentiles               | ¼ | 2 (Unlikely)               |         |
|                           | ½ | 3 (likely after 15 years)  |         |
|                           | ¾ | 4 (likely before 15 years) |         |
| Mann-Whitney U            |   | Statistic                  | P-value |
|                           |   | -0.429                     | 0.668   |
| Wilcoxon (H0: median = 3) |   | Statistic                  | P-value |
|                           |   | 1.252                      | 0.210   |
| Kolmogorov-Smirnov        |   | Statistic                  | P-value |
|                           |   | 0.303                      | 0.000   |
| Shapiro-Wilk              |   | Statistic                  | P-value |
|                           |   | 0.812                      | 0.000   |

|                |                        | Unknown | Unlikely | Likely after 15 years | Likely before 15 years | Total  |
|----------------|------------------------|---------|----------|-----------------------|------------------------|--------|
| Good knowledge | Number of observations | 25      | 9        | 54                    | 35                     | 123    |
|                | Frequency              | 20.3%   | 7.3%     | 43.9%                 | 28.5%                  | 100.0% |
| High Knowledge | Number of observations | 16      | 14       | 65                    | 34                     | 129    |
|                | Frequency              | 12.4%   | 10.9%    | 50.4%                 | 26.4%                  | 100.0% |

### 1.3.3 Please rank the following approaches from most likely to least likely to be successful in fixing or replacing the malfunctioning CFTR gene in the next 15 years

|                              | Most likely (1) | 2      | 3      | Least likely (4) |
|------------------------------|-----------------|--------|--------|------------------|
| CRISPR-Cas9                  | 72.70%          | 13.00% | 3.90%  | 10.40%           |
| TALENs                       | 14.80%          | 43.60% | 26.80% | 14.80%           |
| Meganucleases                | 8.10%           | 11.50% | 35.80% | 44.60%           |
| Zinc Finger Nucleases (ZFNs) | 5.40%           | 31.10% | 34.50% | 29.10%           |

|                |           | CRISPR-Cas9 | TALENs | Meganucleases | Zinc Finger Nucleases (ZFNs) |
|----------------|-----------|-------------|--------|---------------|------------------------------|
| Mann-Whitney U | Statistic | -1.775      | -1.431 | -.122         | -.342                        |
|                | P-value   | 0.076       | 0.152  | 0.903         | 0.732                        |

| CRISPR-Cas9    |                        |       |       |      |       |        |
|----------------|------------------------|-------|-------|------|-------|--------|
|                |                        | 1     | 2     | 3    | 4     | Total  |
| Good knowledge | Number of observations | 47    | 11    | 2    | 11    | 71     |
|                | Frequency              | 66.2% | 15.5% | 2.8% | 15.5% | 100.0% |
| High Knowledge | Number of observations | 65    | 9     | 4    | 5     | 83     |
|                | Frequency              | 78.3% | 10.8% | 4.8% | 6.0%  | 100.0% |

| TALENs         |                        |       |       |       |       |        |
|----------------|------------------------|-------|-------|-------|-------|--------|
|                |                        | 1     | 2     | 3     | 4     | Total  |
| Good knowledge | Number of observations | 12    | 31    | 16    | 8     | 67     |
|                | Frequency              | 17.9% | 46.3% | 23.9% | 11.9% | 100.0% |
| High Knowledge | Number of observations | 10    | 34    | 24    | 14    | 82     |
|                | Frequency              | 12.2% | 41.5% | 29.3% | 17.1% | 100.0% |

| Meganucleases  |                        |       |       |       |       |        |
|----------------|------------------------|-------|-------|-------|-------|--------|
|                |                        | 1     | 2     | 3     | 4     | Total  |
| Good knowledge | Number of observations | 7     | 6     | 25    | 30    | 68     |
|                | Frequency              | 10.3% | 8.8%  | 36.8% | 44.1% | 100.0% |
| High Knowledge | Number of observations | 5     | 11    | 28    | 36    | 80     |
|                | Frequency              | 6.3%  | 13.8% | 35.0% | 45.0% | 100.0% |

| Zinc Finger Nucleases (ZFNs) |                        |      |       |       |       |        |
|------------------------------|------------------------|------|-------|-------|-------|--------|
|                              |                        | 1    | 2     | 3     | 4     | Total  |
| Good knowledge               | Number of observations | 5    | 19    | 25    | 18    | 67     |
|                              | Frequency              | 7.5% | 28.4% | 37.3% | 26.9% | 100.0% |
| High Knowledge               | Number of observations | 3    | 27    | 26    | 25    | 81     |
|                              | Frequency              | 3.7% | 33.3% | 32.1% | 30.9% | 100.0% |

#### 1.4 Respondents who selected genetic therapies as the most likely to be successful in treating CF in the next 15 years

##### 1.4.1 Please rank the following therapies from most likely to least likely to be successful in treating CF in the next 15 years

|                                                 | Most likely (1) | 2      | 3      | 4      | Least likely (5) |
|-------------------------------------------------|-----------------|--------|--------|--------|------------------|
| Adeno-associated viruses (AAVs)-based therapies | 17.70%          | 16.10% | 25.80% | 21.00% | 19.40%           |
| Lentiviruses-based therapies                    | 9.40%           | 17.20% | 15.60% | 35.90% | 21.90%           |
| Liposome-based therapies                        | 19.70%          | 21.20% | 19.70% | 9.10%  | 30.30%           |
| Messenger RNA (mRNA)-based therapies            | 43.90%          | 24.20% | 18.20% | 9.10%  | 4.50%            |
| Transfer RNA (tRNA)-based therapies             | 12.30%          | 23.10% | 20.00% | 23.10% | 21.50%           |

|                |           | Adeno-associated viruses (AAVs)-based therapies | Lentiviruses-based therapies | Liposome-based therapies | Messenger RNA (mRNA)-based therapies | Transfer RNA (tRNA)-based therapies |
|----------------|-----------|-------------------------------------------------|------------------------------|--------------------------|--------------------------------------|-------------------------------------|
| Mann-Whitney U | Statistic | -2.120                                          | -0.232                       | -1.067                   | -0.055                               | -1.144                              |
|                | P-value   | 0.034                                           | 0.816                        | 0.286                    | 0.956                                | 0.253                               |

| Adeno-associated viruses (AAVs)-based therapies |                        |               |       |       |       |                |        |
|-------------------------------------------------|------------------------|---------------|-------|-------|-------|----------------|--------|
|                                                 |                        | Most likely 1 | 2     | 3     | 4     | Least likely 5 | Total  |
| Good knowledge                                  | Number of observations | 8             | 5     | 14    | 7     | 3              | 37     |
|                                                 | Frequency              | 21.6%         | 13.5% | 37.8% | 18.9% | 8.1%           | 100.0% |
| High Knowledge                                  | Number of observations | 3             | 5     | 2     | 6     | 9              | 25     |
|                                                 | Frequency              | 12.0%         | 20.0% | 8.0%  | 24.0% | 36.0%          | 100.0% |

| Lentiviruses-based therapies |                        |               |       |       |       |                |        |
|------------------------------|------------------------|---------------|-------|-------|-------|----------------|--------|
|                              |                        | Most likely 1 | 2     | 3     | 4     | Least likely 5 | Total  |
| Good knowledge               | Number of observations | 3             | 8     | 5     | 13    | 8              | 37     |
|                              | Frequency              | 8.1%          | 21.6% | 13.5% | 35.1% | 21.6%          | 100.0% |
| High Knowledge               | Number of observations | 3             | 3     | 5     | 10    | 6              | 27     |

|  |                  |       |       |       |       |       |        |
|--|------------------|-------|-------|-------|-------|-------|--------|
|  | <b>Frequency</b> | 11.1% | 11.1% | 18.5% | 37.0% | 22.2% | 100.0% |
|--|------------------|-------|-------|-------|-------|-------|--------|

| <b>Liposome-based therapies</b> |                               |                      |          |          |          |                       |              |
|---------------------------------|-------------------------------|----------------------|----------|----------|----------|-----------------------|--------------|
|                                 |                               | <b>Most likely 1</b> | <b>2</b> | <b>3</b> | <b>4</b> | <b>Least likely 5</b> | <b>Total</b> |
| <b>Good knowledge</b>           | <b>Number of observations</b> | 5                    | 9        | 7        | 5        | 12                    | 38           |
|                                 | <b>Frequency</b>              | 13.2%                | 23.7%    | 18.4%    | 13.2%    | 31.6%                 | 100.0%       |
| <b>High Knowledge</b>           | <b>Number of observations</b> | 8                    | 5        | 6        | 1        | 8                     | 28           |
|                                 | <b>Frequency</b>              | 28.6%                | 17.9%    | 21.4%    | 3.6%     | 28.6%                 | 100.0%       |

| <b>Messenger RNA (mRNA)-based therapies</b> |                               |                      |          |          |          |                       |              |
|---------------------------------------------|-------------------------------|----------------------|----------|----------|----------|-----------------------|--------------|
|                                             |                               | <b>Most likely 1</b> | <b>2</b> | <b>3</b> | <b>4</b> | <b>Least likely 5</b> | <b>Total</b> |
| <b>Good knowledge</b>                       | <b>Number of observations</b> | 18                   | 8        | 7        | 4        | 2                     | 39           |
|                                             | <b>Frequency</b>              | 46.2%                | 20.5%    | 17.9%    | 10.3%    | 5.1%                  | 100.0%       |
| <b>High Knowledge</b>                       | <b>Number of observations</b> | 11                   | 8        | 5        | 2        | 1                     | 27           |
|                                             | <b>Frequency</b>              | 40.7%                | 29.6%    | 18.5%    | 7.4%     | 3.7%                  | 100.0%       |

| <b>Transfer RNA (tRNA)-based therapies</b> |                               |                      |          |          |          |                       |              |
|--------------------------------------------|-------------------------------|----------------------|----------|----------|----------|-----------------------|--------------|
|                                            |                               | <b>Most likely 1</b> | <b>2</b> | <b>3</b> | <b>4</b> | <b>Least likely 5</b> | <b>Total</b> |
| <b>Good knowledge</b>                      | <b>Number of observations</b> | 5                    | 9        | 5        | 8        | 12                    | 39           |
|                                            | <b>Frequency</b>              | 12.8%                | 23.1%    | 12.8%    | 20.5%    | 30.8%                 | 100.0%       |
| <b>High Knowledge</b>                      | <b>Number of observations</b> | 3                    | 6        | 8        | 7        | 2                     | 26           |
|                                            | <b>Frequency</b>              | 11.5%                | 23.1%    | 30.8%    | 26.9%    | 7.7%                  | 100.0%       |

#### 1.4.2 Fixing or replacing the CFTR gene will lead to a cure for cystic fibrosis

|                           |   |                            |         |
|---------------------------|---|----------------------------|---------|
| Sample size               |   | 67                         |         |
| Margin of error           |   | 11.9%                      |         |
| Mean                      |   | 3.46                       |         |
| Standard deviation        |   | 0.893                      |         |
| Percentiles               | ¼ | 3 (likely after 15 years)  |         |
|                           | ½ | 4 (likely before 15 years) |         |
|                           | ¾ | 4 (likely before 15 years) |         |
| Mann-Whitney U            |   | Statistic                  | P-value |
|                           |   | -1.748                     | 0.080   |
| Wilcoxon (H0: median = 4) |   | Statistic                  | P-value |
|                           |   | 1.310                      | 0.190   |
| Kolmogorov-Smirnov        |   | Statistic                  | P-value |
|                           |   | 0.383                      | 0.000   |
| Shapiro-Wilk              |   | Statistic                  | P-value |
|                           |   | 0.639                      | 0.000   |

|                   |                           | Unknown | Unlikely | Likely<br>after 15<br>years | Likely<br>before 15<br>years | Total  |
|-------------------|---------------------------|---------|----------|-----------------------------|------------------------------|--------|
| Good<br>knowledge | Number of<br>observations | 5       | 3        | 8                           | 23                           | 39     |
|                   | Frequency                 | 12.8%   | 7.7%     | 20.5%                       | 59.0%                        | 100.0% |
| High<br>Knowledge | Number of<br>observations | 0       | 0        | 7                           | 21                           | 28     |
|                   | Frequency                 | 0.0%    | 0.0%     | 25.0%                       | 75.0%                        | 100.0% |

**1.4.3 Please rank the following approaches from most likely to least likely to be successful in fixing or replacing the malfunctioning CFTR gene in the next 15 years**

|                              | Most likely (1) | 2       | 3      | Least likely (4) |
|------------------------------|-----------------|---------|--------|------------------|
| CRISPR-Cas9                  | 78.70%          | 4.90%   | 6.60%  | 9.80%            |
| TALENs                       | 12.70%          | 52.70%  | 25.50% | 9.10%            |
| Meganucleases                | 5.40%           | 21.40%  | 28.60% | 44.60%           |
| Zinc Finger Nucleases (ZFNs) | 5.40 %          | 21.40 % | 37.50% | 35.70%           |

|                    |           | CRISPR-<br>Cas9 | TALENs | Meganucleases | Zinc Finger<br>Nucleases<br>(ZFNs) |
|--------------------|-----------|-----------------|--------|---------------|------------------------------------|
| Mann-<br>Whitney U | Statistic | -0.516          | -0.305 | -0.289        | -1.143                             |
|                    | P-value   | 0.606           | 0.760  | 0.772         | 0.253                              |

| CRISPR-Cas9       |                           |       |      |      |       |        |
|-------------------|---------------------------|-------|------|------|-------|--------|
|                   |                           | 1     | 2    | 3    | 4     | Total  |
| Good<br>knowledge | Number of<br>observations | 25    | 2    | 3    | 3     | 33     |
|                   | Frequency                 | 75.8% | 6.1% | 9.1% | 9.1%  | 100.0% |
| High<br>Knowledge | Number of<br>observations | 23    | 1    | 1    | 3     | 28     |
|                   | Frequency                 | 82.1% | 3.6% | 3.6% | 10.7% | 100.0% |

| TALENs            |                           |       |       |       |       |        |
|-------------------|---------------------------|-------|-------|-------|-------|--------|
|                   |                           | 1     | 2     | 3     | 4     | Total  |
| Good<br>knowledge | Number of<br>observations | 5     | 13    | 9     | 3     | 30     |
|                   | Frequency                 | 16.7% | 43.3% | 30.0% | 10.0% | 100.0% |
| High<br>Knowledge | Number of<br>observations | 2     | 16    | 5     | 2     | 25     |
|                   | Frequency                 | 8.0%  | 64.0% | 20.0% | 8.0%  | 100.0% |

| Meganucleases |  |   |   |   |   |       |
|---------------|--|---|---|---|---|-------|
|               |  | 1 | 2 | 3 | 4 | Total |



|                       |                               |      |       |       |       |        |
|-----------------------|-------------------------------|------|-------|-------|-------|--------|
| <b>Good knowledge</b> | <b>Number of observations</b> | 2    | 7     | 6     | 15    | 30     |
|                       | <b>Frequency</b>              | 6.7% | 23.3% | 20.0% | 50.0% | 100.0% |
| <b>High Knowledge</b> | <b>Number of observations</b> | 1    | 5     | 10    | 10    | 26     |
|                       | <b>Frequency</b>              | 3.8% | 19.2% | 38.5% | 38.5% | 100.0% |

| <b>Zinc Finger Nucleases (ZFNs)</b> |                               |          |          |          |          |              |
|-------------------------------------|-------------------------------|----------|----------|----------|----------|--------------|
|                                     |                               | <b>1</b> | <b>2</b> | <b>3</b> | <b>4</b> | <b>Total</b> |
| <b>Good knowledge</b>               | <b>Number of observations</b> | 1        | 9        | 12       | 9        | 31           |
|                                     | <b>Frequency</b>              | 3.2%     | 29.0%    | 38.7%    | 29.0%    | 100.0%       |
| <b>High Knowledge</b>               | <b>Number of observations</b> | 2        | 3        | 9        | 11       | 25           |
|                                     | <b>Frequency</b>              | 8.0%     | 12.0%    | 36.0%    | 44.0%    | 100.0%       |

## 1.5 Respondents who selected 'other' option as the most likely to be successful in treating CF in the next 15 years

### 1.5.1 Fixing or replacing the CFTR gene will lead to a cure for cystic fibrosis

|                           |   |                            |         |
|---------------------------|---|----------------------------|---------|
| Sample size               |   | 24                         |         |
| Margin of error           |   | 20.0%                      |         |
| Mean                      |   | 2.67                       |         |
| Standard deviation        |   | 1.129                      |         |
| Percentiles               | ¼ | 2 (Unlikely)               |         |
|                           | ½ | 3 (likely after 15 years)  |         |
|                           | ¾ | 4 (likely before 15 years) |         |
| Mann-Whitney U            |   | Statistic                  | P-value |
|                           |   | -2.190                     | 0.028   |
| Wilcoxon (H0: median = 3) |   | Statistic                  | P-value |
|                           |   | -0.502                     | 0.616   |
| Kolmogorov-Smirnov        |   | Statistic                  | P-value |
|                           |   | 0.199                      | 0.015   |
| Shapiro-Wilk              |   | Statistic                  | P-value |
|                           |   | 0.857                      | 0.003   |

|                       |                               | <b>Unknown</b> | <b>Unlikely</b> | <b>Likely after 15 years</b> | <b>Likely before 15 years</b> | <b>Total</b> |
|-----------------------|-------------------------------|----------------|-----------------|------------------------------|-------------------------------|--------------|
| <b>Good knowledge</b> | <b>Number of observations</b> | 5              | 4               | 3                            | 3                             | 15           |
|                       | <b>Frequency</b>              | 33.3%          | 26.7%           | 20.0%                        | 20.0%                         | 100.0%       |
| <b>High Knowledge</b> | <b>Number of observations</b> | 0              | 1               | 4                            | 4                             | 9            |
|                       | <b>Frequency</b>              | 0.0%           | 11.1%           | 44.4%                        | 44.4%                         | 100.0%       |

**1.5.2 Please rank the following approaches from most likely to least likely to be successful in fixing or replacing the malfunctioning CFTR gene in the next 15 years**

|                              | Most likely (1) | 2      | 3      | Least likely (4) |
|------------------------------|-----------------|--------|--------|------------------|
| CRISPR-Cas9                  | 50,00%          | 0,00%  | 12,50% | 37,50%           |
| TALENs                       | 16,70%          | 33,30% | 50,00% | 0,00%            |
| Meganucleases                | 0,00%           | 16,70% | 33,30% | 50,00%           |
| Zinc Finger Nucleases (ZFNs) | 33,30%          | 50,00% | 0,00%  | 16,70%           |

|                |           | CRISPR-Cas9 | TALENs | Meganucleases | Zinc Finger Nucleases (ZFNs) |
|----------------|-----------|-------------|--------|---------------|------------------------------|
| Mann-Whitney U | Statistic | -2.449      | -1.000 | -1.000        | -2.000                       |
|                | P-value   | 0.014       | 0.317  | 0.317         | 0.046                        |

| CRISPR-Cas9    |                        |       |      |       |        |        |
|----------------|------------------------|-------|------|-------|--------|--------|
|                |                        | 1     | 2    | 3     | 4      | Total  |
| Good knowledge | Number of observations | 0     | 0    | 0     | 3      | 3      |
|                | Frequency              | 0.0%  | 0.0% | 0.0%  | 100.0% | 100.0% |
| High Knowledge | Number of observations | 4     | 0    | 1     | 0      | 5      |
|                | Frequency              | 80.0% | 0.0% | 20.0% | 0.0%   | 100.0% |

| TALENs         |                        |       |        |       |      |        |
|----------------|------------------------|-------|--------|-------|------|--------|
|                |                        | 1     | 2      | 3     | 4    | Total  |
| Good knowledge | Number of observations | 0     | 2      | 0     | 0    | 2      |
|                | Frequency              | 0.0%  | 100.0% | 0.0%  | 0.0% | 100.0% |
| High Knowledge | Number of observations | 1     | 0      | 3     | 0    | 4      |
|                | Frequency              | 25.0% | 0.0%   | 75.0% | 0.0% | 100.0% |

| Meganucleases  |                        |      |       |        |       |        |
|----------------|------------------------|------|-------|--------|-------|--------|
|                |                        | 1    | 2     | 3      | 4     | Total  |
| Good knowledge | Number of observations | 0    | 0     | 2      | 0     | 2      |
|                | Frequency              | 0.0% | 0.0%  | 100.0% | 0.0%  | 100.0% |
| High Knowledge | Number of observations | 0    | 1     | 0      | 3     | 4      |
|                | Frequency              | 0.0% | 25.0% | 0.0%   | 75.0% | 100.0% |

| Zinc Finger Nucleases (ZFNs) |                        |   |   |   |   |       |
|------------------------------|------------------------|---|---|---|---|-------|
|                              |                        | 1 | 2 | 3 | 4 | Total |
| Good knowledge               | Number of observations | 2 | 0 | 0 | 0 | 2     |

|                       |                               |        |       |      |       |        |
|-----------------------|-------------------------------|--------|-------|------|-------|--------|
|                       | <b>Frequency</b>              | 100.0% | 0.0%  | 0.0% | 0.0%  | 100.0% |
| <b>High Knowledge</b> | <b>Number of observations</b> | 0      | 3     | 0    | 1     | 4      |
|                       | <b>Frequency</b>              | 0.0%   | 75.0% | 0.0% | 25.0% | 100.0% |

## 2 Descriptive statistics of the results according to the chosen therapeutic option and the respondents' level of knowledge

### 2.1 Respondents who selected CFTR modulator therapies as the most likely to be successful in treating CF in the next 15 years

#### 2.1.1 Please rank the following approaches from most likely to least likely to be successful in treating cystic fibrosis in the next 15 years

##### Potentiators

|                           | 1                | 2                 | 3                | 4               | Total              | Score |
|---------------------------|------------------|-------------------|------------------|-----------------|--------------------|-------|
| Q1: I have high knowledge | 26.77% 34        | 58.27% 74         | 8.66% 11         | 6.30% 8         | 43.49% 127         | 3.06  |
| Q1: I have good knowledge | 24.17% 29        | 44.17% 53         | 20.83% 25        | 10.83% 13       | 41.10% 120         | 2.82  |
| Q1: I have some knowledge | 17.95% 7         | 43.59% 17         | 25.64% 10        | 12.82% 5        | 13.36% 39          | 2.67  |
| <b>Total</b>              | <b>23.97% 70</b> | <b>49.32% 144</b> | <b>15.75% 46</b> | <b>8.90% 26</b> | <b>100.00% 292</b> |       |

**Answered 292**

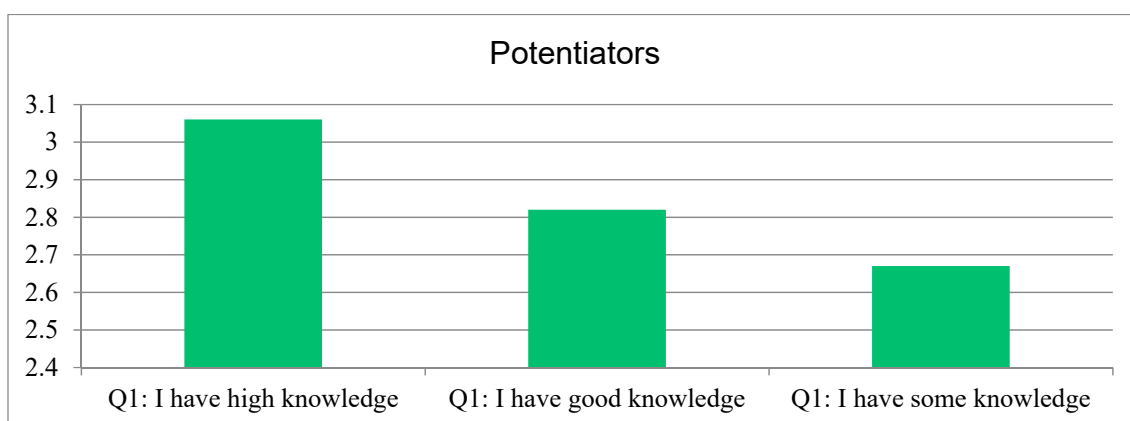

##### Correctors

|                           | 1                 | 2                | 3                | 4                | Total              | Score |
|---------------------------|-------------------|------------------|------------------|------------------|--------------------|-------|
| Q1: I have high knowledge | 62.50% 80         | 23.44% 30        | 6.25% 8          | 7.81% 10         | 43.84% 128         | 3.41  |
| Q1: I have good knowledge | 51.24% 62         | 23.14% 28        | 12.40% 15        | 13.22% 16        | 41.44% 121         | 3.12  |
| Q1: I have some knowledge | 39.47% 15         | 18.42% 7         | 21.05% 8         | 21.05% 8         | 13.01% 38          | 2.76  |
| <b>Total</b>              | <b>53.77% 157</b> | <b>22.26% 65</b> | <b>10.62% 31</b> | <b>11.64% 34</b> | <b>100.00% 292</b> |       |

**Answered 292**



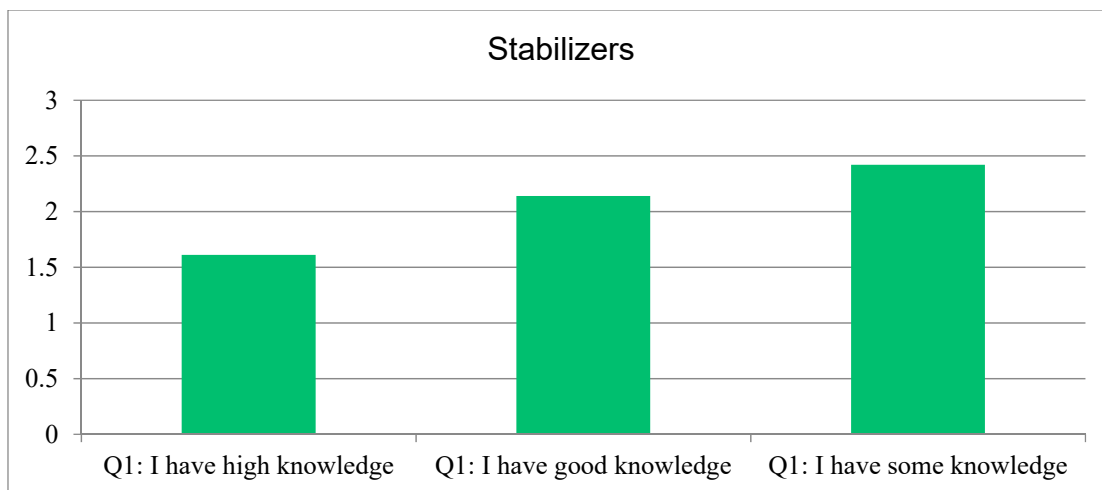

### 2.1.2 Fixing or replacing the CFTR gene will lead to a cure for cystic fibrosis

|                           | Likely before 15 years |    | Likely after 15 years |     | Unlikely |    | Unknown |    | Total   |     |
|---------------------------|------------------------|----|-----------------------|-----|----------|----|---------|----|---------|-----|
| Q1: I have high knowledge | 26.36%                 | 34 | 50.39%                | 65  | 10.85%   | 14 | 12.40%  | 16 | 43.43%  | 129 |
| Q1: I have good knowledge | 28.46%                 | 35 | 43.90%                | 54  | 7.32%    | 9  | 20.33%  | 25 | 41.41%  | 123 |
| Q1: I have some knowledge | 28.89%                 | 13 | 42.22%                | 19  | 6.67%    | 3  | 22.22%  | 10 | 15.15%  | 45  |
| Total                     | 27.61%                 | 82 | 46.46%                | 138 | 8.75%    | 26 | 17.17%  | 51 | 100.00% | 297 |

Answered 297

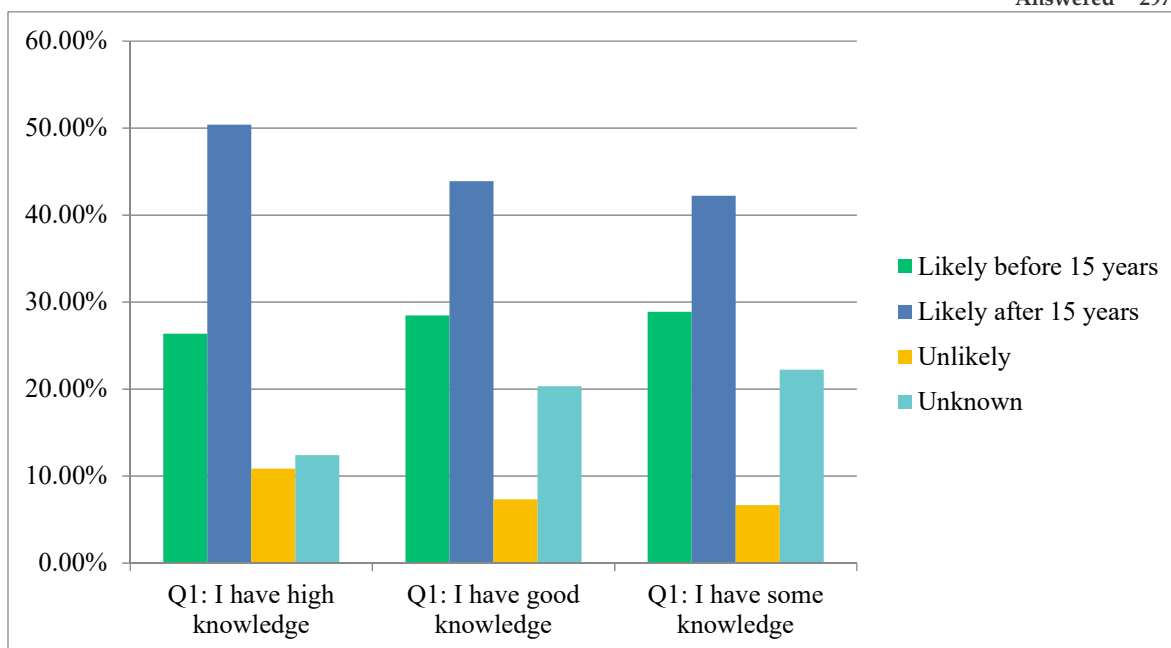

### 2.1.3 Please rank the following approaches from most likely to least likely to be successful in fixing or replacing the malfunctioning CFTR gene in the next 15 years

**CRISPR-Cas9**

|                           | 1      |     | 2      |    | 3     |   | 4      |    | Total   |     | Score |  |
|---------------------------|--------|-----|--------|----|-------|---|--------|----|---------|-----|-------|--|
| Q1: I have high knowledge | 78.31% | 65  | 10.84% | 9  | 4.82% | 4 | 6.02%  | 5  | 45.86%  | 83  | 3.61  |  |
| Q1: I have good knowledge | 66.20% | 47  | 15.49% | 11 | 2.82% | 2 | 15.49% | 11 | 39.23%  | 71  | 3.32  |  |
| Q1: I have some knowledge | 70.83% | 17  | 8.33%  | 2  | 8.33% | 2 | 12.50% | 3  | 13.26%  | 24  | 3.38  |  |
| Total                     | 71.27% | 129 | 12.15% | 22 | 4.42% | 8 | 10.50% | 19 | 100.00% | 181 |       |  |

Answered 181

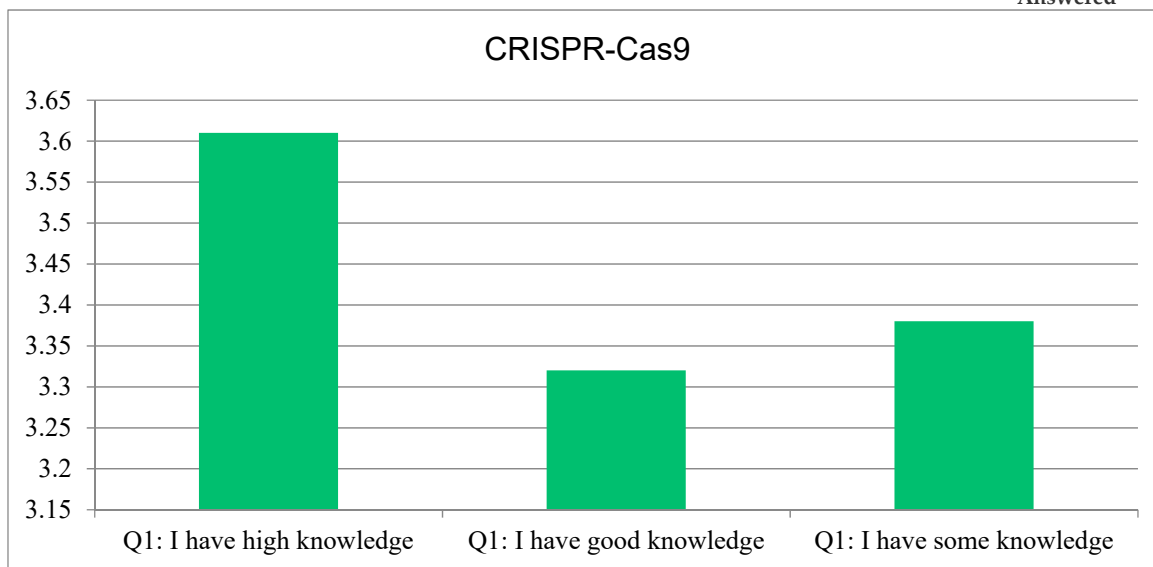

### TALENs

|                           | 1      |    | 2      |    | 3      |    | 4      |    | Total   | Score |      |
|---------------------------|--------|----|--------|----|--------|----|--------|----|---------|-------|------|
| Q1: I have high knowledge | 12.20% | 10 | 41.46% | 34 | 29.27% | 24 | 17.07% | 14 | 45.30%  | 82    | 2.49 |
| Q1: I have good knowledge | 17.91% | 12 | 46.27% | 31 | 23.88% | 16 | 11.94% | 8  | 37.02%  | 67    | 2.7  |
| Q1: I have some knowledge | 19.05% | 4  | 33.33% | 7  | 23.81% | 5  | 23.81% | 5  | 11.60%  | 21    | 2.48 |
| Total                     | 14.36% | 26 | 39.78% | 72 | 24.86% | 45 | 14.92% | 27 | 100.00% | 181   |      |

Answered 181

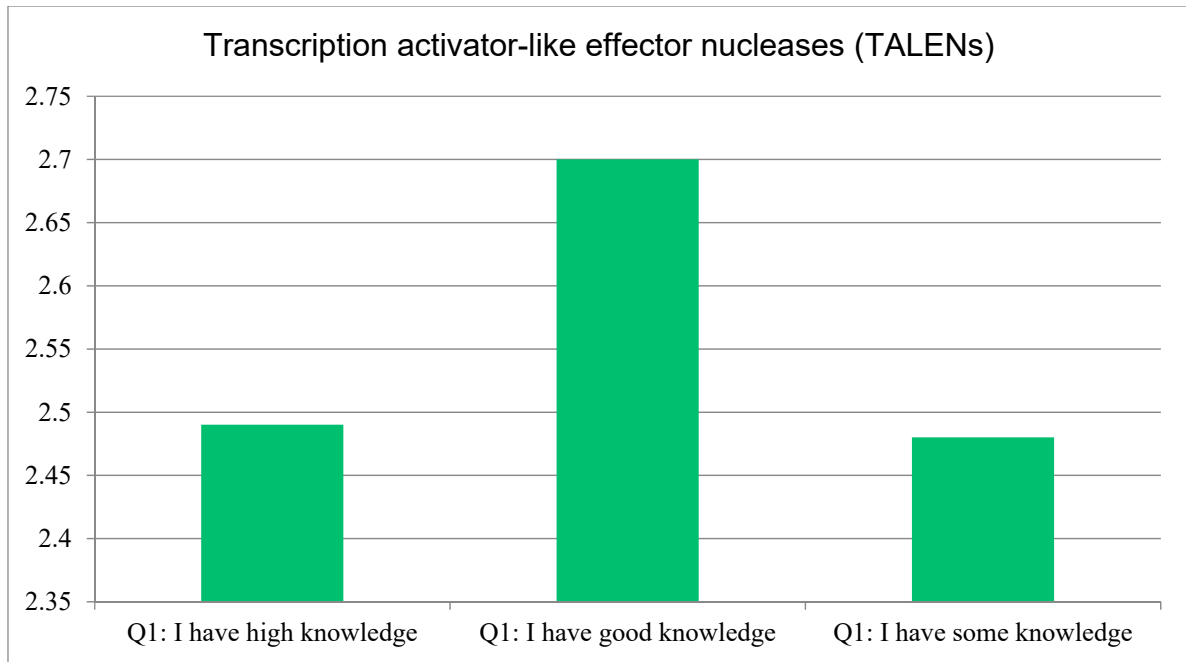

### Meganucleases (MNs)

|                           | 1      |    | 2      |    | 3      |    | 4      |    | Total   | Score |      |
|---------------------------|--------|----|--------|----|--------|----|--------|----|---------|-------|------|
| Q1: I have high knowledge | 6.25%  | 5  | 13.75% | 11 | 35.00% | 28 | 45.00% | 36 | 44.20%  | 80    | 1.81 |
| Q1: I have good knowledge | 10.29% | 7  | 8.82%  | 6  | 36.76% | 25 | 44.12% | 30 | 37.57%  | 68    | 1.85 |
| Q1: I have some knowledge | 0.00%  | 0  | 31.82% | 7  | 40.91% | 9  | 27.27% | 6  | 12.15%  | 22    | 2.05 |
| Total                     | 6.63%  | 12 | 13.26% | 24 | 34.25% | 62 | 39.78% | 72 | 100.00% | 181   |      |

**Answered 181**

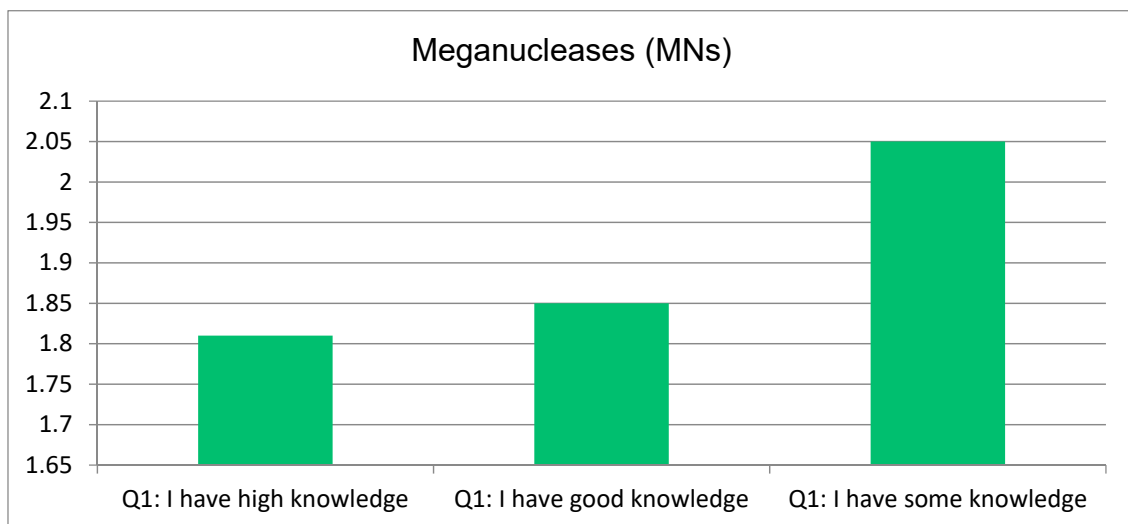

### Zinc finger nucleases (ZFNs)

|                           | 1        | 2         | 3         | 4         | Total       | Score |
|---------------------------|----------|-----------|-----------|-----------|-------------|-------|
| Q1: I have high knowledge | 3.70% 3  | 33.33% 27 | 32.10% 26 | 30.86% 25 | 44.75% 81   | 2.1   |
| Q1: I have good knowledge | 7.46% 5  | 28.36% 19 | 37.31% 25 | 26.87% 18 | 37.02% 67   | 2.16  |
| Q1: I have some knowledge | 9.52% 2  | 28.57% 6  | 23.81% 5  | 38.10% 8  | 11.60% 21   | 2.1   |
| Total                     | 5.52% 10 | 28.73% 52 | 30.94% 56 | 28.18% 51 | 100.00% 181 |       |

Answered 181

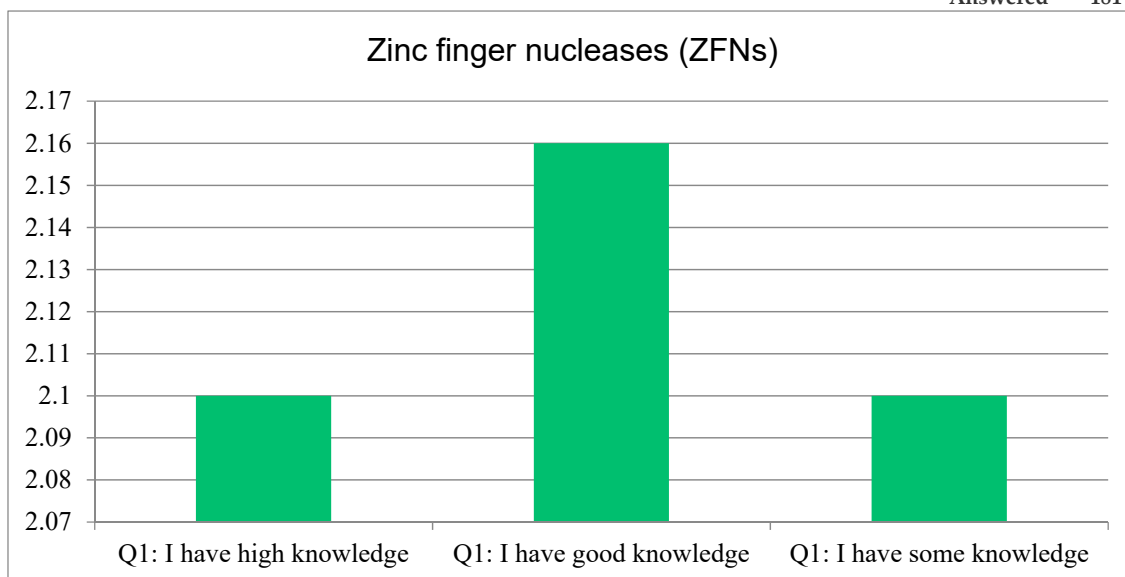

## 2.2 Respondents who selected genetic therapies as the most likely to be successful in treating CF in the next 15 years

### 2.2.1 Please rank the following therapies from most likely to least likely to be successful in treating CF in the next 15 years

#### AAVs-based therapies

|                           | 1         | 2         | 3         | 4         | 5         | Total      | Score |
|---------------------------|-----------|-----------|-----------|-----------|-----------|------------|-------|
| Q1: I have high knowledge | 12.00% 3  | 20.00% 5  | 8.00% 2   | 24.00% 6  | 36.00% 9  | 27.17% 25  | 2.48  |
| Q1: I have good knowledge | 22.22% 8  | 13.89% 5  | 36.11% 13 | 19.44% 7  | 8.33% 3   | 39.13% 36  | 3.22  |
| Q1: I have some knowledge | 26.09% 6  | 26.09% 6  | 8.70% 2   | 21.74% 5  | 17.39% 4  | 25.00% 23  | 3.22  |
| Total                     | 18.48% 17 | 17.39% 16 | 18.48% 17 | 19.57% 18 | 17.39% 16 | 100.00% 92 |       |

Answered 92



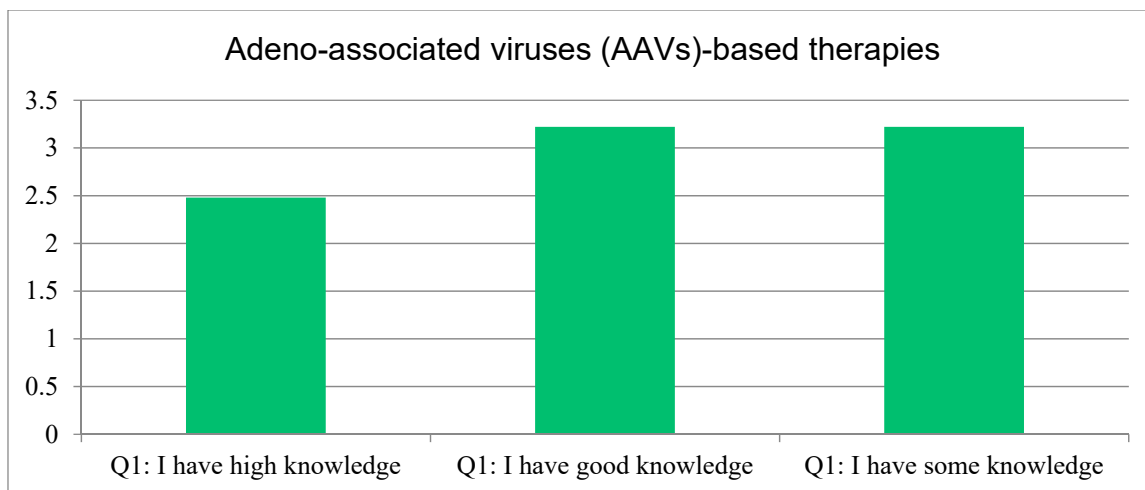

### Lentiviruses-bases therapies

|                           | 1         | 2         | 3         | 4         | 5         | Total   | Score   |
|---------------------------|-----------|-----------|-----------|-----------|-----------|---------|---------|
| Q1: I have high knowledge | 11.11% 3  | 11.11% 3  | 18.52% 5  | 37.04% 10 | 22.22% 6  | 29.35%  | 27 2.52 |
| Q1: I have good knowledge | 8.33% 3   | 22.22% 8  | 13.89% 5  | 36.11% 13 | 19.44% 7  | 39.13%  | 36 2.64 |
| Q1: I have some knowledge | 22.73% 5  | 9.09% 2   | 18.18% 4  | 36.36% 8  | 13.64% 3  | 23.91%  | 22 2.91 |
| Total                     | 11.96% 11 | 14.13% 13 | 15.22% 14 | 33.70% 31 | 17.39% 16 | 100.00% | 92      |

**Answered 92**

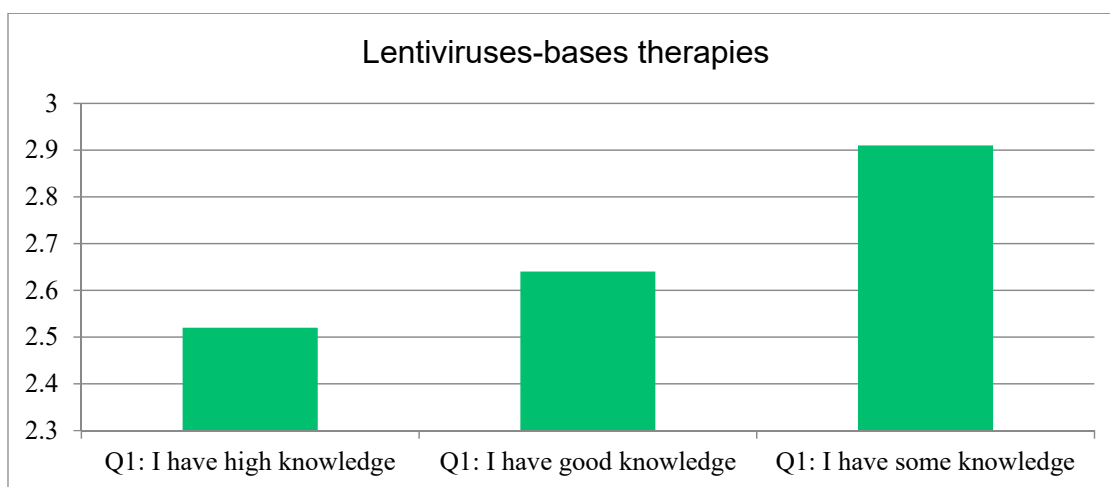

### Liposome-based therapies

|                           | 1         | 2         | 3         | 4         | 5         | Total   | Score   |
|---------------------------|-----------|-----------|-----------|-----------|-----------|---------|---------|
| Q1: I have high knowledge | 28.57% 8  | 17.86% 5  | 21.43% 6  | 3.57% 1   | 28.57% 8  | 30.43%  | 28 3.14 |
| Q1: I have good knowledge | 13.51% 5  | 21.62% 8  | 18.92% 7  | 13.51% 5  | 32.43% 12 | 40.22%  | 37 2.7  |
| Q1: I have some knowledge | 13.04% 3  | 21.74% 5  | 30.43% 7  | 17.39% 4  | 17.39% 4  | 25.00%  | 23 2.96 |
| Total                     | 17.39% 16 | 19.57% 18 | 21.74% 20 | 10.87% 10 | 26.09% 24 | 100.00% | 92      |

**Answered 92**

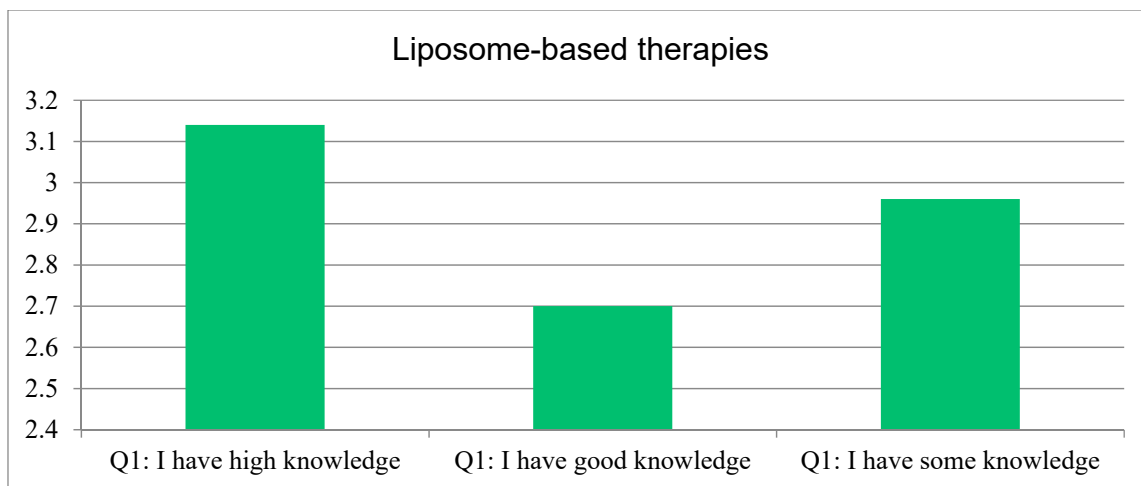

### mRNA-based therapies

|                           | 1         | 2         | 3         | 4         | 5        | Total   | Score   |
|---------------------------|-----------|-----------|-----------|-----------|----------|---------|---------|
| Q1: I have high knowledge | 40.74% 11 | 29.63% 8  | 18.52% 5  | 7.41% 2   | 3.70% 1  | 29.35%  | 27 3.96 |
| Q1: I have good knowledge | 44.74% 17 | 21.05% 8  | 18.42% 7  | 10.53% 4  | 5.26% 2  | 41.30%  | 38 3.89 |
| Q1: I have some knowledge | 34.62% 9  | 19.23% 5  | 11.54% 3  | 15.38% 4  | 19.23% 5 | 28.26%  | 26 3.35 |
| Total                     | 40.22% 37 | 22.83% 21 | 16.30% 15 | 10.87% 10 | 8.70% 8  | 100.00% | 92      |

Answered 92

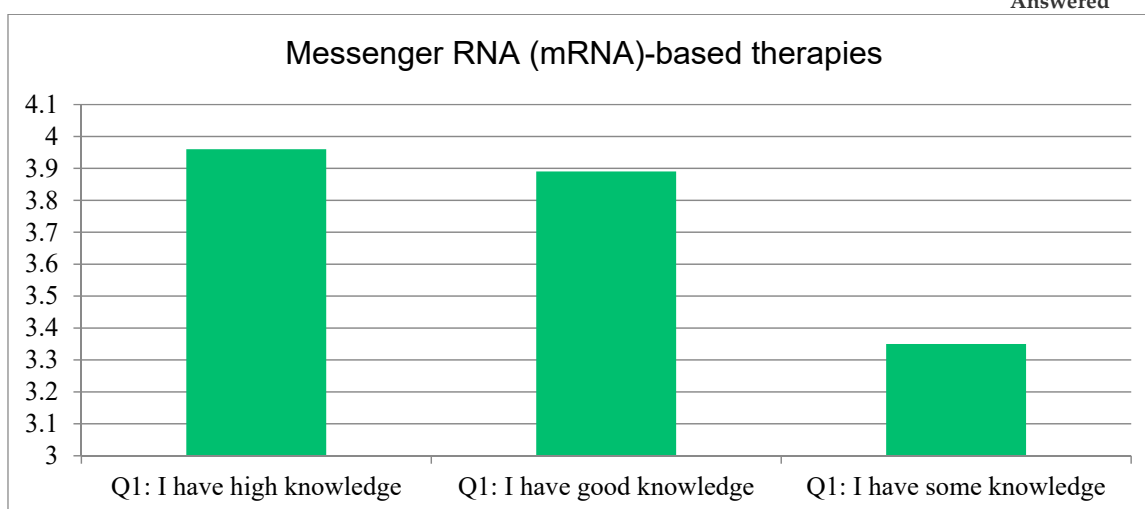

### tRNA-based therapies

|                           | 1        | 2         | 3         | 4         | 5         | Total   | Score   |
|---------------------------|----------|-----------|-----------|-----------|-----------|---------|---------|
| Q1: I have high knowledge | 11.54% 3 | 23.08% 6  | 30.77% 8  | 26.92% 7  | 7.69% 2   | 28.26%  | 26 3.04 |
| Q1: I have good knowledge | 13.16% 5 | 23.68% 9  | 13.16% 5  | 18.42% 7  | 31.58% 12 | 41.30%  | 38 2.68 |
| Q1: I have some knowledge | 4.76% 1  | 23.81% 5  | 28.57% 6  | 4.76% 1   | 38.10% 8  | 22.83%  | 21 2.52 |
| Total                     | 9.78% 9  | 21.74% 20 | 20.65% 19 | 16.30% 15 | 23.91% 22 | 100.00% | 92      |

Answered 92

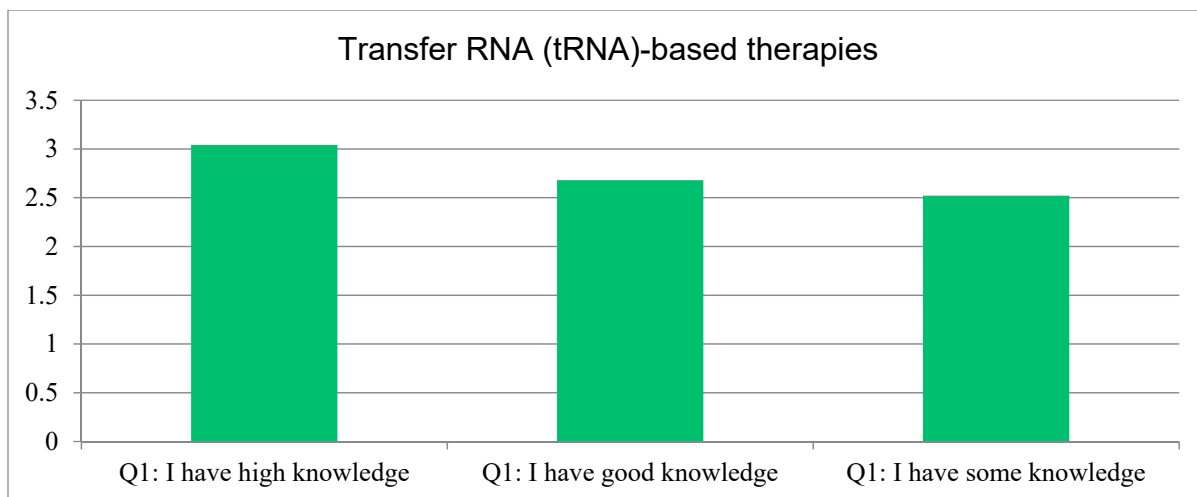

## 2.2.2 Fixing or replacing the CFTR gene will lead to a cure for cystic fibrosis

|                           | Likely before 15 years |    | Likely after 15 years |    | Unlikely |   | Unknown |   | Total   |    |
|---------------------------|------------------------|----|-----------------------|----|----------|---|---------|---|---------|----|
| Q1: I have high knowledge | 75.00%                 | 21 | 25.00%                | 7  | 0.00%    | 0 | 0.00%   | 0 | 30.11%  | 28 |
| Q1: I have good knowledge | 58.97%                 | 23 | 20.51%                | 8  | 7.69%    | 3 | 12.82%  | 5 | 41.94%  | 39 |
| Q1: I have some knowledge | 61.54%                 | 16 | 23.08%                | 6  | 0.00%    | 0 | 15.38%  | 4 | 27.96%  | 26 |
| Total                     | 64.52%                 | 60 | 22.58%                | 21 | 3.23%    | 3 | 9.68%   | 9 | 100.00% | 93 |

Answered 93

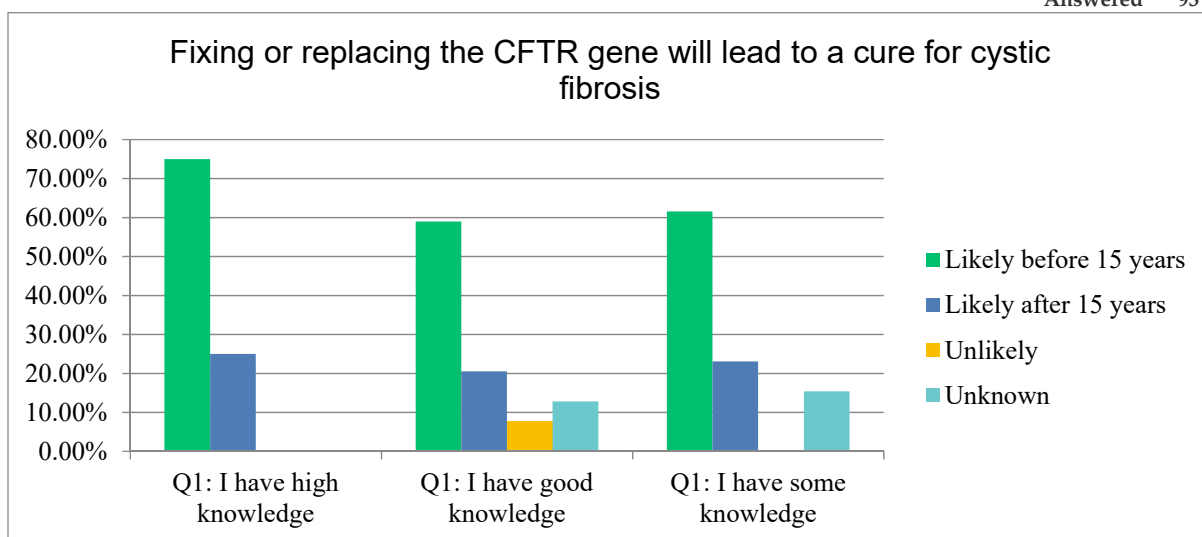

## 2.2.3 Please rank the following approaches from most likely to least likely to be successful in fixing or replacing the malfunctioning CFTR gene in the next 15 years

### CRISPR-Cas9

|                           | 1         | 2        | 3       | 4        | Total  | Score   |
|---------------------------|-----------|----------|---------|----------|--------|---------|
| Q1: I have high knowledge | 82.14% 23 | 3.57% 1  | 3.57% 1 | 10.71% 3 | 32.94% | 28 3.57 |
| Q1: I have good knowledge | 75.76% 25 | 6.06% 2  | 9.09% 3 | 9.09% 3  | 38.82% | 33 3.48 |
| Q1: I have some knowledge | 69.57% 16 | 13.04% 3 | 8.70% 2 | 8.70% 2  | 27.06% | 23 3.43 |

|       |        |    |       |   |       |   |       |   |                 |           |
|-------|--------|----|-------|---|-------|---|-------|---|-----------------|-----------|
| Total | 75.29% | 64 | 7.06% | 6 | 7.06% | 6 | 9.41% | 8 | 100.00%         | 85        |
|       |        |    |       |   |       |   |       |   | <b>Answered</b> | <b>85</b> |

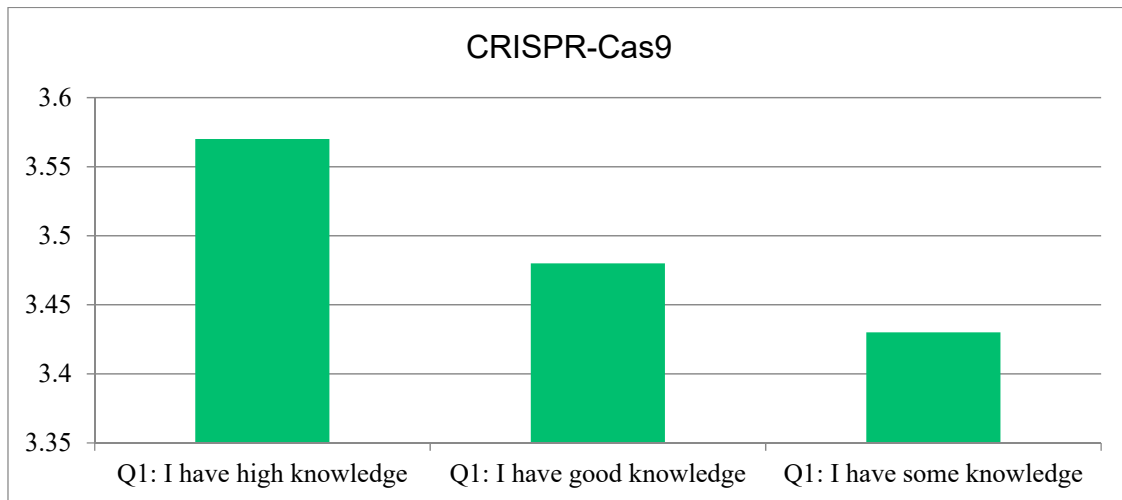

## TALENs

|                           | 1      |   | 2      |    | 3      |    | 4      |   | Total   | Score |      |
|---------------------------|--------|---|--------|----|--------|----|--------|---|---------|-------|------|
| Q1: I have high knowledge | 8.00%  | 2 | 64.00% | 16 | 20.00% | 5  | 8.00%  | 2 | 29.41%  | 25    | 2.72 |
| Q1: I have good knowledge | 16.67% | 5 | 43.33% | 13 | 30.00% | 9  | 10.00% | 3 | 35.29%  | 30    | 2.67 |
| Q1: I have some knowledge | 5.56%  | 1 | 61.11% | 11 | 16.67% | 3  | 16.67% | 3 | 21.18%  | 18    | 2.56 |
| Total                     | 9.41%  | 8 | 47.06% | 40 | 20.00% | 17 | 9.41%  | 8 | 100.00% | 85    |      |

Answered 85

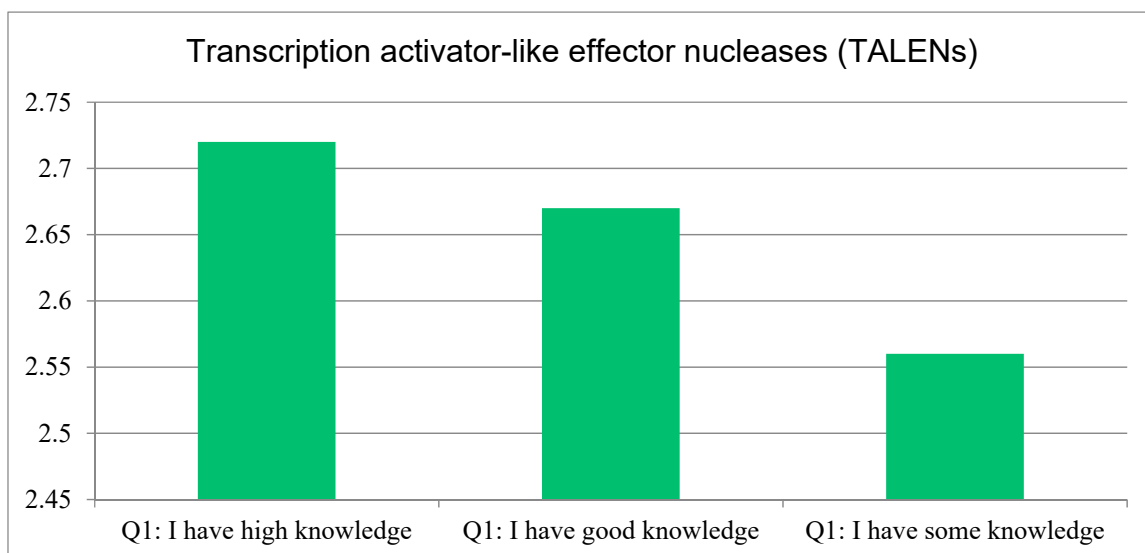

## Meganucleases (MNs)

|                           | 1      |   | 2      |    | 3      |    | 4      |    | Total   | Score |      |
|---------------------------|--------|---|--------|----|--------|----|--------|----|---------|-------|------|
| Q1: I have high knowledge | 3.85%  | 1 | 19.23% | 5  | 38.46% | 10 | 38.46% | 10 | 30.59%  | 26    | 1.88 |
| Q1: I have good knowledge | 6.67%  | 2 | 23.33% | 7  | 20.00% | 6  | 50.00% | 15 | 35.29%  | 30    | 1.87 |
| Q1: I have some knowledge | 13.33% | 2 | 13.33% | 2  | 26.67% | 4  | 46.67% | 7  | 17.65%  | 15    | 1.93 |
| Total                     | 5.88%  | 5 | 16.47% | 14 | 23.53% | 20 | 37.65% | 32 | 100.00% | 85    |      |

Answered 85

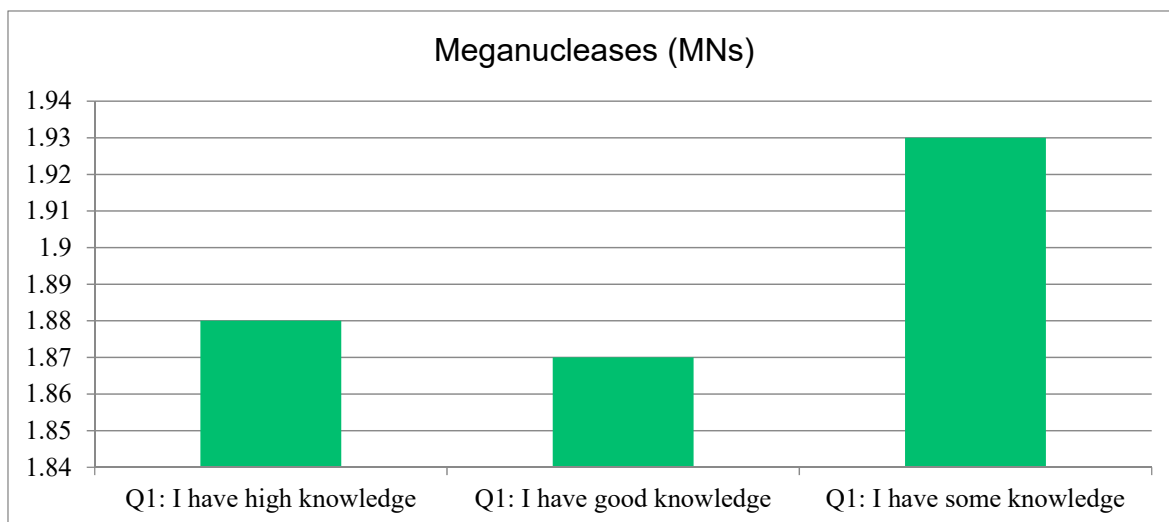

### Zinc finger nucleases (ZFNs)

|                           | 1        | 2         | 3         | 4         | Total   | Score   |
|---------------------------|----------|-----------|-----------|-----------|---------|---------|
| Q1: I have high knowledge | 8.00% 2  | 12.00% 3  | 36.00% 9  | 44.00% 11 | 29.41%  | 25 1.84 |
| Q1: I have good knowledge | 3.23% 1  | 29.03% 9  | 38.71% 12 | 29.03% 9  | 36.47%  | 31 2.06 |
| Q1: I have some knowledge | 11.76% 2 | 17.65% 3  | 47.06% 8  | 23.53% 4  | 20.00%  | 17 2.18 |
| Total                     | 5.88% 5  | 17.65% 15 | 34.12% 29 | 28.24% 24 | 100.00% | 85      |

Answered 85

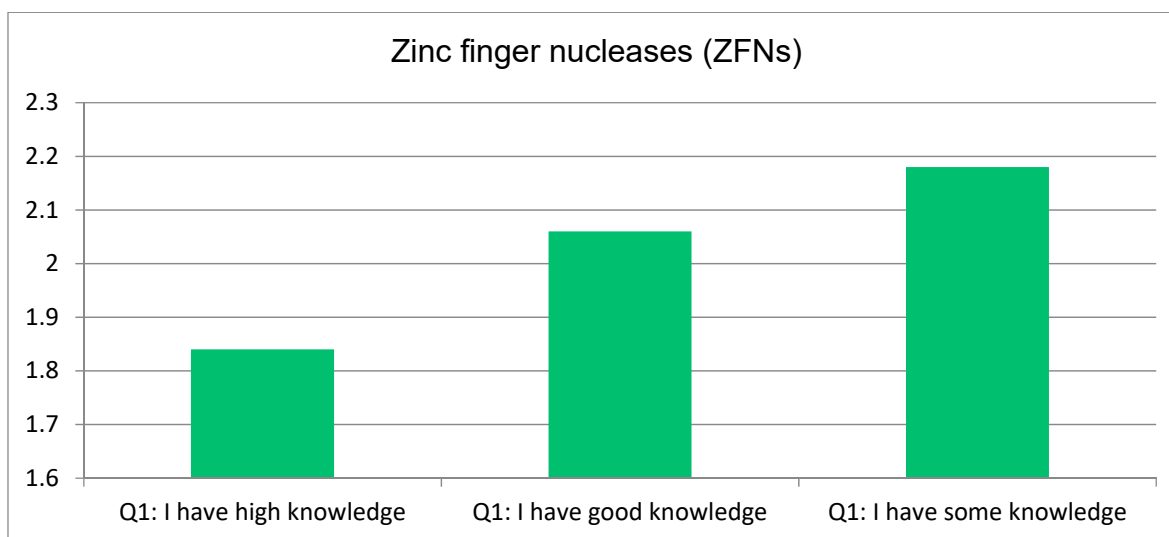

## 2.3 Respondents who selected 'other' option as the most likely to be successful in treating CF in the next 15 years

### 2.3.1 Fixing or replacing the CFTR gene will lead to a cure for cystic fibrosis

|                           | Likely before 15 years |   | Likely after 15 years |   | Unlikely |   | Unknown |   | Total   |    |
|---------------------------|------------------------|---|-----------------------|---|----------|---|---------|---|---------|----|
| Q1: I have high knowledge | 44.44%                 | 4 | 44.44%                | 4 | 11.11%   | 1 | 0.00%   | 0 | 30.00%  | 9  |
| Q1: I have good knowledge | 14.29%                 | 2 | 21.43%                | 3 | 28.57%   | 4 | 35.71%  | 5 | 46.67%  | 14 |
| Q1: I have some knowledge | 28.57%                 | 2 | 0.00%                 | 0 | 28.57%   | 2 | 42.86%  | 3 | 23.33%  | 7  |
| Total                     | 26.67%                 | 8 | 23.33%                | 7 | 23.33%   | 7 | 26.67%  | 8 | 100.00% | 30 |

Answered 30

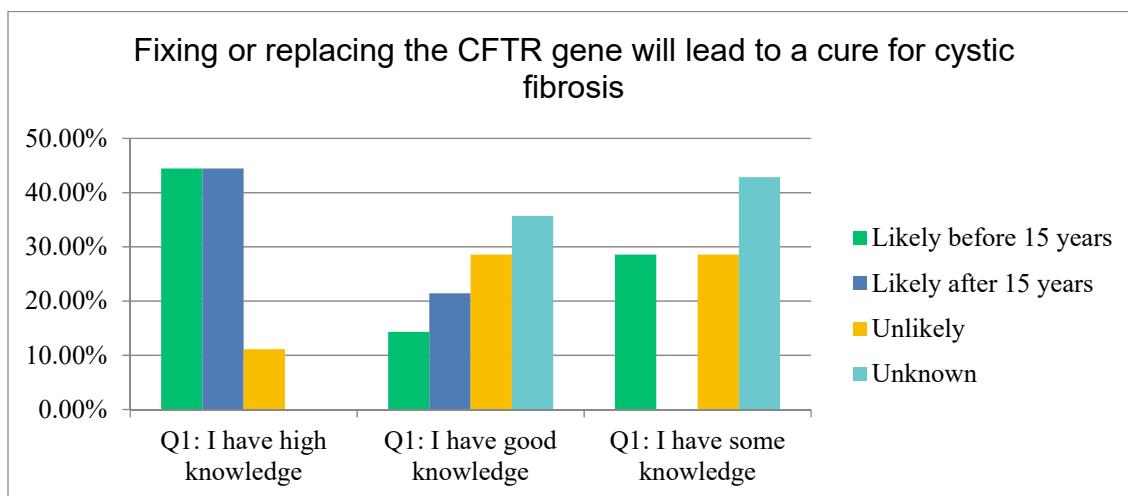

### 2.3.2 Please rank the following approaches from most likely to least likely to be successful in fixing or replacing the malfunctioning CFTR gene in the next 15 years

#### CRISPR-Cas9

|                           | 1       |   | 2     |   | 3      |   | 4       |   | Total   | Score |
|---------------------------|---------|---|-------|---|--------|---|---------|---|---------|-------|
| Q1: I have high knowledge | 80.00%  | 4 | 0.00% | 0 | 20.00% | 1 | 0.00%   | 0 | 55.56%  | 5 3.6 |
| Q1: I have good knowledge | 0.00%   | 0 | 0.00% | 0 | 0.00%  | 0 | 100.00% | 3 | 33.33%  | 3 1   |
| Q1: I have some knowledge | 100.00% | 1 | 0.00% | 0 | 0.00%  | 0 | 0.00%   | 0 | 11.11%  | 1 4   |
| Total                     | 55.56%  | 5 | 0.00% | 0 | 11.11% | 1 | 33.33%  | 3 | 100.00% | 9     |

Answered 9

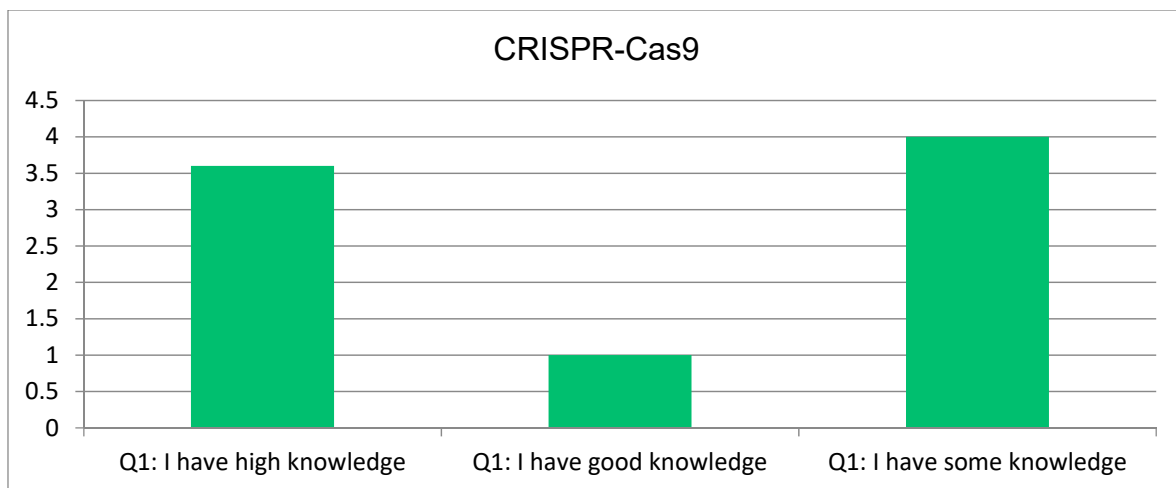

### TALENs

|                           | 1      |   | 2       |   | 3      |   | 4     |   | Total   | Score |
|---------------------------|--------|---|---------|---|--------|---|-------|---|---------|-------|
| Q1: I have high knowledge | 25.00% | 1 | 0.00%   | 0 | 75.00% | 3 | 0.00% | 0 | 44.44%  | 4     |
| Q1: I have good knowledge | 0.00%  | 0 | 100.00% | 2 | 0.00%  | 0 | 0.00% | 0 | 22.22%  | 2     |
| Q1: I have some knowledge | 0.00%  | 0 | 0.00%   | 0 | 0.00%  | 0 | 0.00% | 0 | 0.00%   | 0     |
| Total                     | 11.11% | 1 | 22.22%  | 2 | 33.33% | 3 | 0.00% | 0 | 100.00% | 9     |

Answered 9

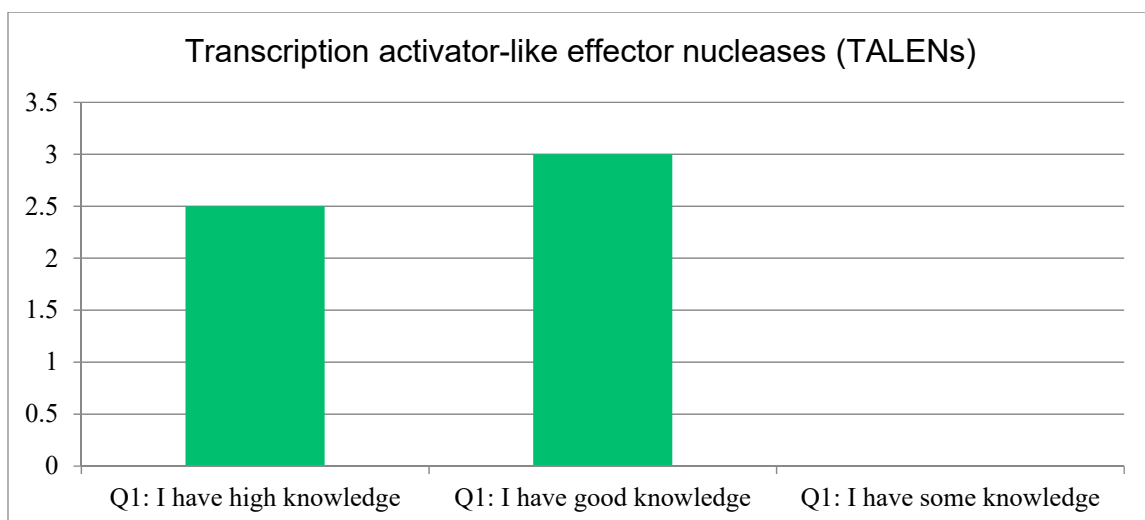

### Meganucleases (MNs)

|                           | 1     |   | 2      |   | 3       |   | 4      |   | Total   | Score |
|---------------------------|-------|---|--------|---|---------|---|--------|---|---------|-------|
| Q1: I have high knowledge | 0.00% | 0 | 25.00% | 1 | 0.00%   | 0 | 75.00% | 3 | 44.44%  | 4     |
| Q1: I have good knowledge | 0.00% | 0 | 0.00%  | 0 | 100.00% | 2 | 0.00%  | 0 | 22.22%  | 2     |
| Q1: I have some knowledge | 0.00% | 0 | 0.00%  | 0 | 0.00%   | 0 | 0.00%  | 0 | 0.00%   | 0     |
| Total                     | 0.00% | 0 | 11.11% | 1 | 22.22%  | 2 | 33.33% | 3 | 100.00% | 9     |

Answered 9

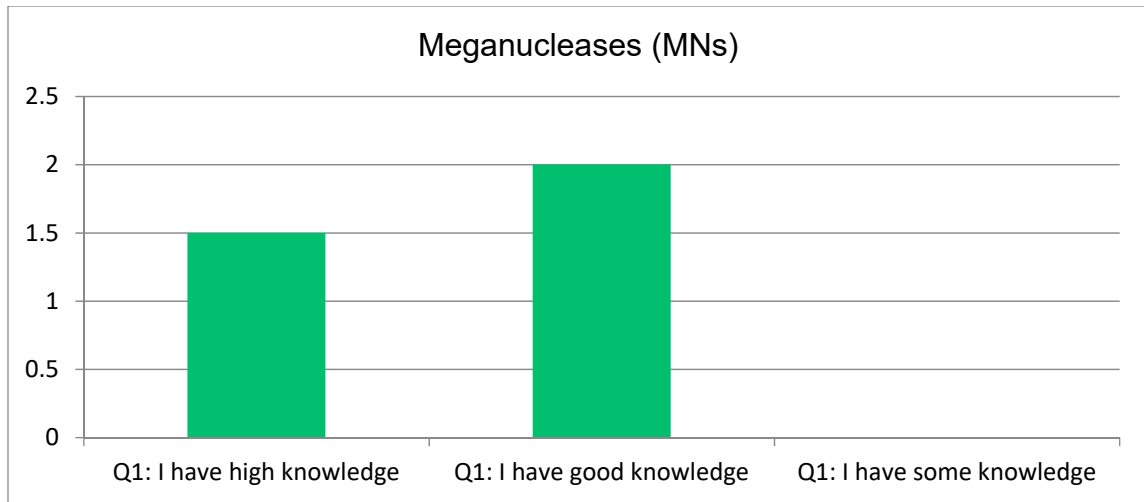

### Zinc finger nucleases (ZFNs)

|                           | 1       |   | 2       |   | 3     |   | 4      |   | Total   | Score |     |
|---------------------------|---------|---|---------|---|-------|---|--------|---|---------|-------|-----|
| Q1: I have high knowledge | 0.00%   | 0 | 75.00%  | 3 | 0.00% | 0 | 25.00% | 1 | 44.44%  | 4     | 2.5 |
| Q1: I have good knowledge | 100.00% | 2 | 0.00%   | 0 | 0.00% | 0 | 0.00%  | 0 | 22.22%  | 2     | 4   |
| Q1: I have some knowledge | 0.00%   | 0 | 100.00% | 1 | 0.00% | 0 | 0.00%  | 0 | 11.11%  | 1     | 3   |
| Total                     | 22.22%  | 2 | 44.44%  | 4 | 0.00% | 0 | 11.11% | 1 | 100.00% | 9     |     |
| Answered                  |         |   |         |   |       |   |        |   |         | 9     |     |

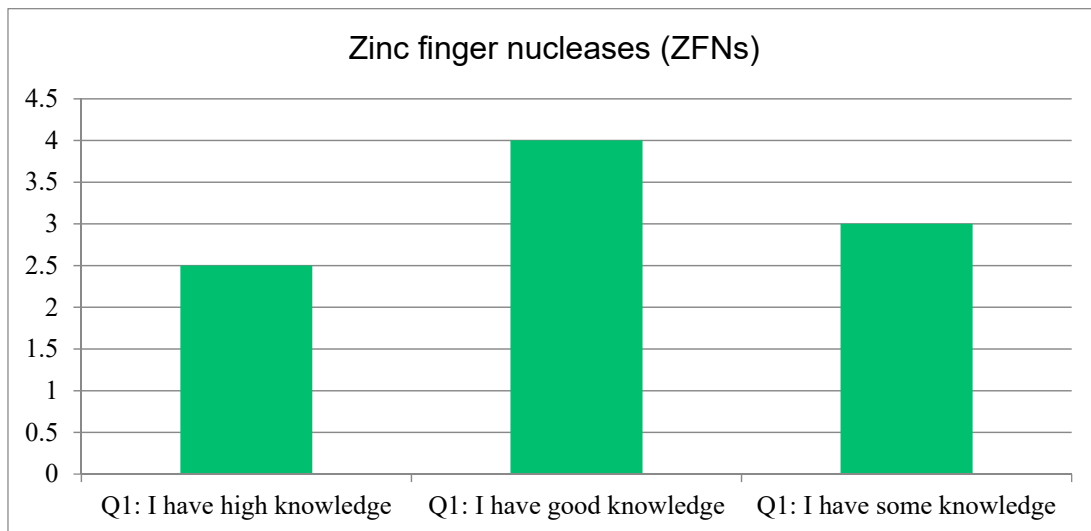

Supplement: s1 [file s1]
